# Supplementary material for: Blood markers of endothelial dysfunction and their correlation to cerebrovascular reactivity in patients with chronic hepatitis C infection
Source: PeerJ. 2021 Jan 14;9:e10723. doi: 10.7717/peerj.10723 (PMC7811780; doi:10.7717/peerj.10723)
Supplement: Data S1 [file peerj-09-10723-s001.xlsx]

## Sheet: Sheet1
	Examinee	VEGF-A (pg/ml)	ICAM-1 (ng/ml)	sVCAM-1 (ng/ml)	E-selektin (ng/ml)	sex	age	smoking	alcohol	hep C	disease duration (y)	BMI
1	323/15.2.	677.97	654.94	1663.15	92.02	1	28	1	0	1	4	19.9
2	314/29.3.	479.02	285.01	758.04	70.82	1	28	1	0	0		22
3	315/29.3.	900.87	336.82	845.09	60.86	1	22	0	0	0		24.8
4	380/29.3.	625.38	346.56	1271.2	87.48	1	38	0	1	0		28.3
5	381/29.3.	744.19	415.3	747.44	71.6	1	38	0	1	0		24.8
6	289/4.4.	395.86	328.84	604	69.03	1	35	0	0	0		29.4
7	334/10.4.	1909.67	317.78	764.24	49.93	1	24	0	1	0		23.4
8	195/17.4.	1088.61	548.36	970.99	104	1	36	1	0	1	20	25
9	293/17.4.	529.7	522.44	841.65	123.55	1	33	1	0	1	8	26.2
10	334/17.4.	676.45	865.92	1932.55	90.84	1	35	1	0	1	10	27.2
11	373/18.4.	856.66	437.27	889.82	38.89	0	38	1	0	1	15	28.1
12	374/18.4.	708.25	575.09	1031.91	90.03	1	37	1	0	1	13	21.2
13	307/24.4.	171.42	625.83	>5242,25	74.91	1	43	0	0	1	15	28.7
14	317/24.4.	670.91	462.47	3098.16	64.1	1	40	1	0	1	12	27.2
15	319/24.4.	605.96	456.16	1007.7	45.06	1	42	1	1	1	20	25.2
16	282/29.5.	873.21	460.85	649.12	77.2	1	42	0	0	0		30.7
17	292/29.5.	324.77	381.45	713.07	92.13	1	41	0	1	0		24.9
18	293/29.5.	625.38	438.79	725.24	75.83	1	43	1	1	0		33.3
19	183/30.5.	633.59	638.97	874.99	157.61	1	40	1	0	1	15	31.1
20	397/13.6.	1390.34	355.64	903.03	86.89	1	37	1	1	0		26
21	406/13.6.	824.21	432.56	586.64	70.14	1	34	1	1	1	10	29.3
22	222/19.9.	367.7	787.01	1021.55	120.77	1	43	1	1	1	20	25.3
23	292/9.12.	274.62	387.18	1490.1	54.3	1	32	0	0	1	15	20.1
24	339/10.12.	477.51	665.48	1210.3	105.06	1	38	1	0	1	18	22.5
25	340/10.12.	996.81	339.07	863.28	34.34	1	40	1	0	0		32.1
26	273/10.12.	1190.19	508.05	868.42	107.32	1	44	0	0	1	20	27.1
27	316/11.12.	510.73	385.42	1178.78	22.67	0	42	1	0	1	5	19.5
28	317/11.12.	962.7	459.04	1095	86.06	1	40	0	0	0		25.2
29	215/15.12.	1447.31	315.37	719.77	113.65	1	43	0	0	0		30.2
30	167/24.12.	984.28	289.77	745.81	26.97	0	30	0	0	0		23
31	136/31.12.	937.66	286.65	872.95	52.69	1	39	1	0	0		25.3
32	295/12.1.	503.06	366.07	1321.17	24.81	0	40	0	0	1	19	23.5
33	341/12.1.	1133.17	466.16	1045.3	54.38	1	29	0	0	0		29.3
34	269/23.12.	1062.65	506.78	978.81	37.55	1	35	0	1	0		29.3
35	248/23.12.	387.22	733.72	901.69	150.37	1	47	1	0	1	23	27.2
36	245/23.12.	912	447.17	966.12	96.51	1	32	0	1	0		25.8
